# Supplementary material for: Desalinating Real Shale Gas Wastewater by Membrane Distillation: Performance and Potentials
Source: MDPI journal article supplement (doi:10.3390/w15030439), 2023-01-22
Supplement: s1 [file s1]

**Supporting information**  
**Desalinating real shale gas wastewater by membrane**  
**distillation: Performance and potentials**

Yuting Wang<sup>a</sup>, Haoquan Zhang<sup>a</sup>, Ruixue Zhao<sup>a</sup>, Die Wang<sup>a</sup>, Lu Zhou<sup>a</sup>, Le Han<sup>a\*</sup>

<sup>a</sup> Key Laboratory of the Three Gorges Reservoir Region's Eco-Environment, Ministry of Education,  
School of Environment and Ecology, Chongqing University, Chongqing 400045, PR China

\*Corresponding Author: Le Han;

Email: lehan@cqu.edu.cn;

Tel: +86-023-65120750

Method S1. MD process cost estimation.

The water production cost (WPC) is the sum of annual fixed charges (AFC) and annual operating cost (AOC). All the parameters necessary for this cost estimation are listed in Tables SM1 and SM2[41,44].

$$WPC = \frac{AFC + AOC}{f \cdot M \cdot 365} \quad (SM1)$$

where  $f$  and  $M$  represent plant availability and capacity, respectively. The AFC consists of direct capital cost (DCC) and indirect capital cost (ICC), with the latter approximating 10% of the former[44]:

$$AFC = DCC + ICC = (1 + 10\%) \cdot DCC \quad (SM2)$$

DCC involves mainly the cost of the MD process equipment, namely, membrane, pumps, heat exchangers, with the remaining cost as for civil work including installation, building, controlling and so on, assumed to be 1/3 of the former, and the land cost not considered[41,44].

$$DCC = (1 + 33\%) \cdot (\Psi_{\text{memb}} + \Psi_{\text{pump}} + \Psi_{\text{HX}}) \quad (SM3)$$

$$\Psi_{\text{memb}} = A_{\text{memb}} \cdot \Pi_{\text{memb}} = \frac{1000 \cdot M}{24 \cdot J} \cdot \Pi_{\text{memb}} \quad (SM4)$$

$$\Psi_{\text{pump}} = 4.78E - 06 \cdot \frac{M}{R} \cdot \Delta P \quad (SM5)$$

$$\Psi_{\text{HX}} = A_{\text{HX}} \cdot \Pi_{\text{HX}} = \frac{Q_{\text{HX}} \cdot \Delta T}{U} \cdot \Pi_{\text{HX}} \quad (SM6)$$

where  $\Psi$  is the cost,  $A$  is total membrane area required,  $\Pi$  is the specific cost,  $R$  is water recovery rate,  $J$  is membrane flux,  $Q$  is heat to be provided by the heat exchanger and  $U$  is global heat transfer coefficient of membrane module. The annual operating costs (AOC) involves membrane replacement, electricity and steam, manpower, brine disposal, consumables, amortization, etc.

$$AOC = \Psi_{\text{memb,replace}} + \Psi_{\text{electricity}} + \Psi_{\text{steam}} + \Psi_{\text{manpower}} + \Psi_{\text{brine}} + \quad (SM7)$$

$$\Psi_{\text{consumables}} = 15\% \cdot \Psi_{\text{membr}} + \Pi_{\text{electricity}} \cdot \Psi_{\text{electricity}} + \Pi_{\text{steam}} \cdot$$

$$\Psi_{\text{steam}} + \Pi_{\text{manpower}} \cdot f \cdot M \cdot 365 + \Pi_{\text{brine}} \cdot f \cdot M \cdot 365 + \Pi_{\text{consumables}} \cdot$$

$$f \cdot M \cdot 365 + a \cdot AFC$$

where  $a$  is the amortization factor and

$$\Psi_{\text{electricity}} = \frac{365M \cdot \Delta P}{R \cdot \eta_{\text{pump}}} \cdot 2 \quad (SM8)$$

$$\Psi_{\text{steam}} = \frac{365 \cdot 1000M \cdot C_{p,\text{water}} \cdot \Delta T}{R \cdot h_{\text{steam}}} \quad (SM9)$$

where  $\eta$ ,  $R$ ,  $h$  and  $C_p$  stand for pump efficiency, water recovery, steam specific enthalpy and water specific heat, respectively.

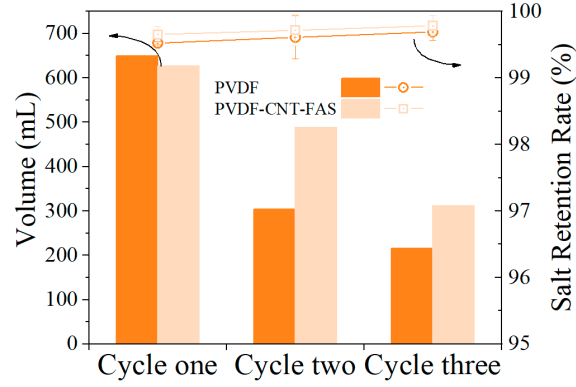

Figure S1. Water recovery volume and salt retention rate on the permeate side after concentration during the three cycles in MD.

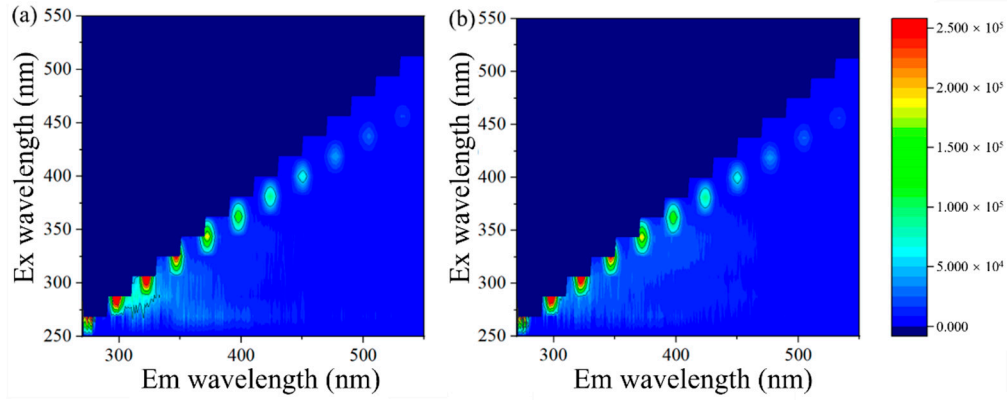

Figure S2. Cleaning of organic foulants on membrane surface with acid: (a) PVDF membrane (b) PVDF-CNT-FAS membrane.

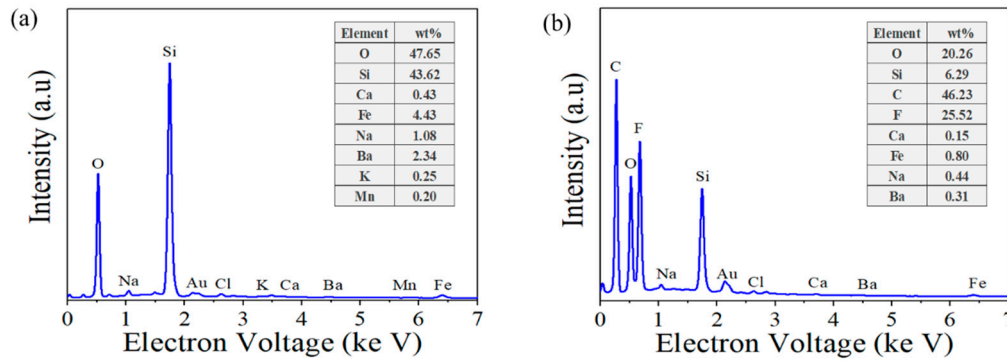

Figure S3. SEM-EDS coupled determination of fouled membrane (a) PVDF and (b) PVDF-CNT-FAS surface elements.

Table S1 Assumption parameters and specific costs in economic analysis.

| <i>Pre-define parameters</i>          |      |
|---------------------------------------|------|
| Plant availability (f)                | 90%  |
| Plant capacity, M (m <sup>3</sup> /d) | 2000 |
| Plant life (year)                     | 20   |

|                                                   |         |
|---------------------------------------------------|---------|
| Interest rate                                     | 0.05    |
| Amortization factor (a)                           | 0.08    |
| <b><i>Operating conditions</i></b>                |         |
| DCMD Feed inlet temperature (°C)                  | 40      |
| DCMD $\Delta t$ (°C)                              | 25      |
| DCMD flux (kg/m <sup>2</sup> h)                   | 13.75   |
| DCMD recovery                                     | 0.5     |
| DCMD feed pressure (Pa)                           | 120,000 |
| <b><i>Specific costs</i></b>                      |         |
| Electricity cost (\$/kwh)                         | 0.08    |
| Membrane cost (\$/m <sup>2</sup> )                | 51.76   |
| Membrane replacement (yr <sup>-1</sup> )          | 0.2     |
| Spares cost (\$/m <sup>3</sup> )                  | 0.033   |
| Labor cost (\$/m <sup>3</sup> )                   | 0.03    |
| Chemical cost (\$/m <sup>3</sup> )                | 0.018   |
| Brine disposal (\$/m <sup>3</sup> )               | 0.0015  |
| Pre-treatment (\$/m <sup>2</sup> )                | 0.01    |
| Steam heat exchanger cost (\$/m <sup>2</sup> )    | 2000    |
| Heat recovery exchanger cost (\$/m <sup>2</sup> ) | 1540    |

Table S2 Fixed and Operating cost per cubic meter of shale gas wastewater treatment.

| <b><i>Fixed cost</i></b>     |                | <b><i>AFC (\$/m<sup>3</sup>)</i></b> | <b><i>Ratio (%)</i></b> |
|------------------------------|----------------|--------------------------------------|-------------------------|
| Direct investment            | Membrane       | 0.47                                 | 56.30                   |
|                              | Pump           | 0.0032                               | 0.39                    |
|                              | Heat exchanger | 0.10                                 | 11.66                   |
|                              | Construction   | 0.19                                 | 22.56                   |
| Indirect investment          | Spares         | 0.07                                 | 9.09                    |
| Sum                          |                | 0.83                                 | 100.00                  |
| <b><i>Operating cost</i></b> |                | <b><i>AOC (\$/m<sup>3</sup>)</i></b> | <b><i>Ratio (%)</i></b> |
| Membrane replacement         |                | 0.12                                 | 8.60                    |
| Electric                     |                | 0.10                                 | 7.04                    |
| Heat                         |                | 1.06                                 | 77.53                   |
| Chemical                     |                | 0.02                                 | 1.22                    |
| Maintenance                  |                | 0.03                                 | 2.24                    |
| Labor                        |                | 0.03                                 | 2.04                    |
| Brine disposal               |                | 0.0014                               | 0.10                    |
| Pre-treatment                |                | 0.02                                 | 1.22                    |
| Sum                          |                | 1.36                                 | 100.00                  |
